# Supplementary material for: A Brazilian randomized study: Robotic-Assisted vs. Video-assisted lung lobectomy Outcomes (BRAVO trial)
Source: PubMed Central journal article supplement — J Bras Pneumol. 2022 Jul 1;48(4):e20210464. doi: 10.36416/1806-3756/e20210464 (PMC9262442; doi:10.36416/1806-3756/e20210464), 2022-07-01
Supplement: 1806-3756-jbpneu-48-04-e20210464-suppl1.pdf [file 1806-3756-jbpneu-48-04-e20210464-suppl1.pdf]

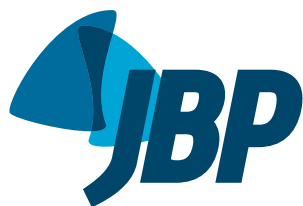

## A Brazilian randomized study: Robotic-Assisted vs. Video-assisted lung lobectomy Outcomes (BRAVO trial)

Ricardo Mingarini Terra<sup>1</sup>, Pedro Henrique Xavier Nabuco de Araujo<sup>1</sup>,  
Leticia Leone Lauricella<sup>1</sup>, Jose Ribas Milanese de Campos<sup>1</sup>,  
Juliana Rocha Mol Trindade<sup>1</sup>, Paulo Manuel Pêgo-Fernandes<sup>1</sup>

**Table S1.** Comparison of pathological results between the groups.

| Variable                | Group            |                  | p    |
|-------------------------|------------------|------------------|------|
|                         | RATS<br>(n = 37) | VATS<br>(n = 39) |      |
| Primary tumor           |                  |                  | 0.60 |
| Adenocarcinoma          | 27               | 24               |      |
| Squamous cell carcinoma | 4                | 7                |      |
| Carcinoid tumor         | 3                | 4                |      |
| Other                   | 3 <sup>a</sup>   | 4 <sup>b</sup>   |      |
| Pathological stage      |                  |                  | 0.36 |
| IA                      | 22               | 18               |      |
| IB                      | 4                | 4                |      |
| IIA                     | 1                | 2                |      |
| IIB                     | 3                | 5                |      |
| IIIA                    | 3                | 6                |      |
| IV                      | 1                | 0                |      |
| N upstaging             | 3 <sup>c</sup>   | 5 <sup>d</sup>   | 0.71 |

<sup>a</sup>Breast cancer metastasis, in 1; inflammatory myofibroblastic tumor, in 1; and no cancer (atypical adenomatous hyperplasia), in 1. <sup>b</sup>Renal cancer metastases, in 2; melanoma metastasis, in 1; and small cell lung cancer, in 1. <sup>c</sup>N upstaging from cN0 to pN1, in 2; and from cN0 to pN2, in 1. <sup>d</sup>N upstaging from cN0 to pN1, in 2; and from cN0 to pN2, in 3.

**Table S2.** Comparison of postoperative pain and opioid use 30 days after surgery between the groups.

| Variable                        | Group            |                  | p    |
|---------------------------------|------------------|------------------|------|
|                                 | RATS<br>(n = 37) | VATS<br>(n = 39) |      |
| Postoperative pain <sup>a</sup> |                  |                  |      |
| POD 1                           | 5                | 2                | 0.26 |
| POD 2                           | 3                | 1                | 0.35 |
| POD 3                           | 1                | 0                | 0.49 |
| POD 30                          | 1                | 2                | 1.00 |
| Any opioid on POD 30            | 9                | 12               | 0.61 |

POD: postoperative day. <sup>a</sup>Visual analog scale score<sup>(16)</sup> > 2.
